# Supplementary material for: A simplified and facile preparation method for the [Ca24Al28O64]4+(e−)4 electride
Source: Royal Society of Chemistry journal article supplement (doi:10.1039/d3dt01637d), 2023-01-01
Supplement: d3dt01637d1.pdf [file d3dt01637d1.pdf]

## Supporting Information

### A Simplified and Facile Preparation Method for $[\text{Ca}_{24}\text{Al}_{28}\text{O}_{64}]^{4+}(\text{e}^{-})_4$ Electride

Xiangyu Zhang,<sup>a,b,c</sup> Yunlei Chen,<sup>b,c</sup> Yongfang Sun,<sup>b,c</sup> Fei Wang,<sup>b</sup> Xiao-Dong Wen<sup>\*b,c</sup> and Tian-Nan Ye<sup>\*a</sup>

<sup>a</sup>*Frontiers Science Center for Transformative Molecules, School of Chemistry and Chemical Engineering, Shanghai Jiao Tong University, Shanghai 200240, China.*

<sup>b</sup>*State Key Laboratory of Coal Conversion, Institute of Coal Chemistry, Chinese Academy of Sciences, Taiyuan 030001, P. R. China.*

<sup>c</sup>*National Energy Center for Coal to Liquids, Synfuels China Co., Ltd, Huairou District, Beijing 101400, P. R. China.*

E-mail: [ytn@sjtu.edu.cn](mailto:ytn@sjtu.edu.cn) (Tian-Nan Ye)

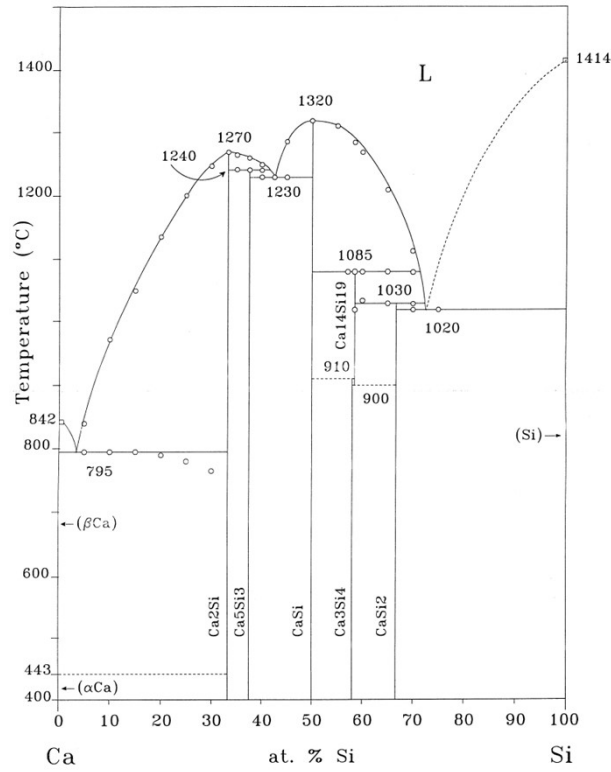

**Figure S1.** The binary alloy phase diagram of Ca and Si.<sup>[1]</sup>

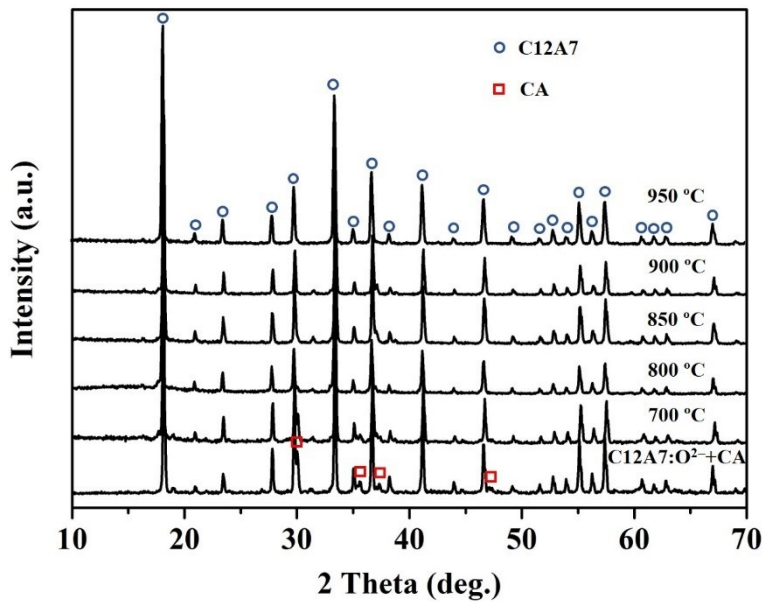

**Figure S2.** Powder XRD patterns of C12A7:O<sup>2-</sup>+CA and CaH<sub>2</sub> at different calcination temperature. All obtained powders were washed with a solution of 0.1 M NH<sub>4</sub>Cl in methanol.

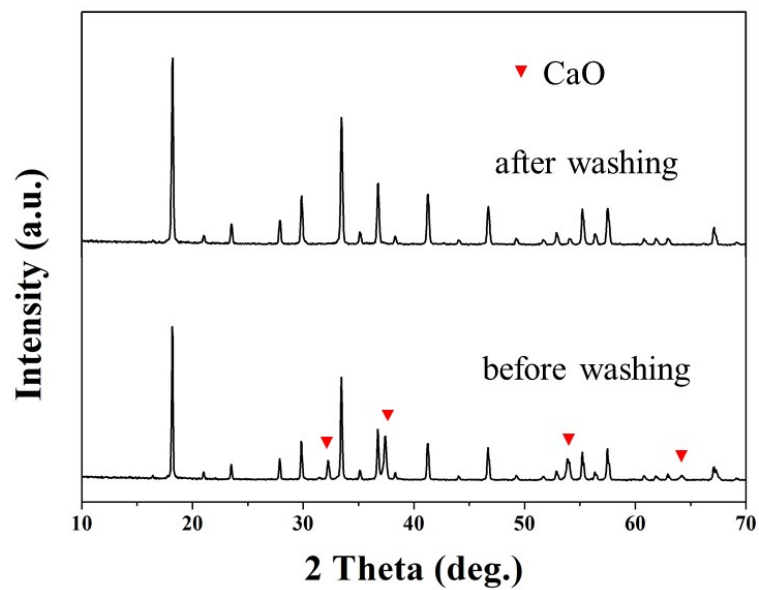

**Figure S3.** Powder XRD patterns of before and after washing of C12A7:O<sup>2-</sup>+CA and CaH<sub>2</sub> at 950 °C.

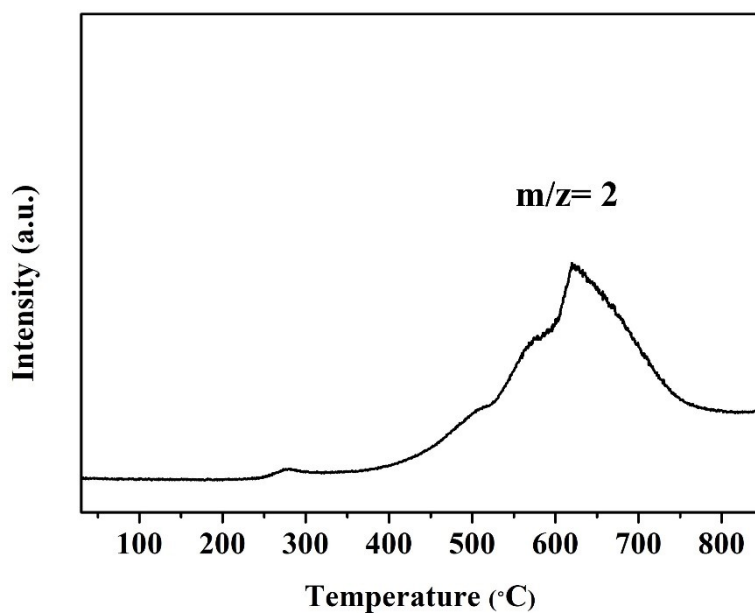

**Figure S4.** TPD profile of C12A7:e<sup>-</sup> powder.

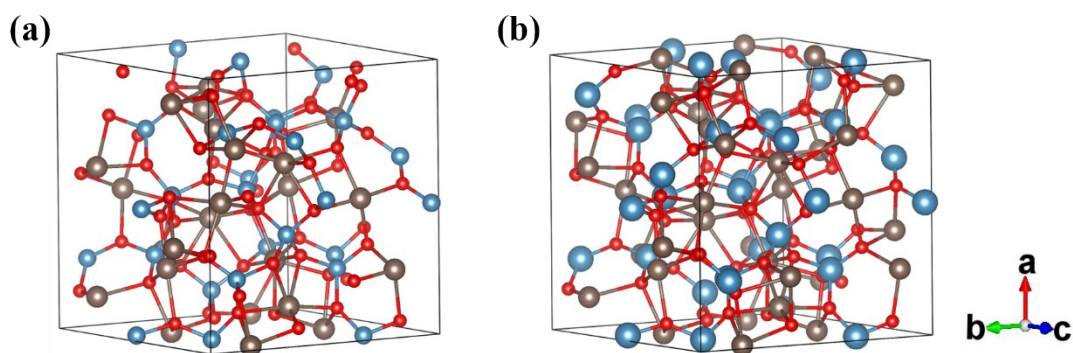

**Figure S5.** The optimized structure models of  $\text{C12A7:O}^{2-}$  and  $\text{C12A7:e}^-$ .

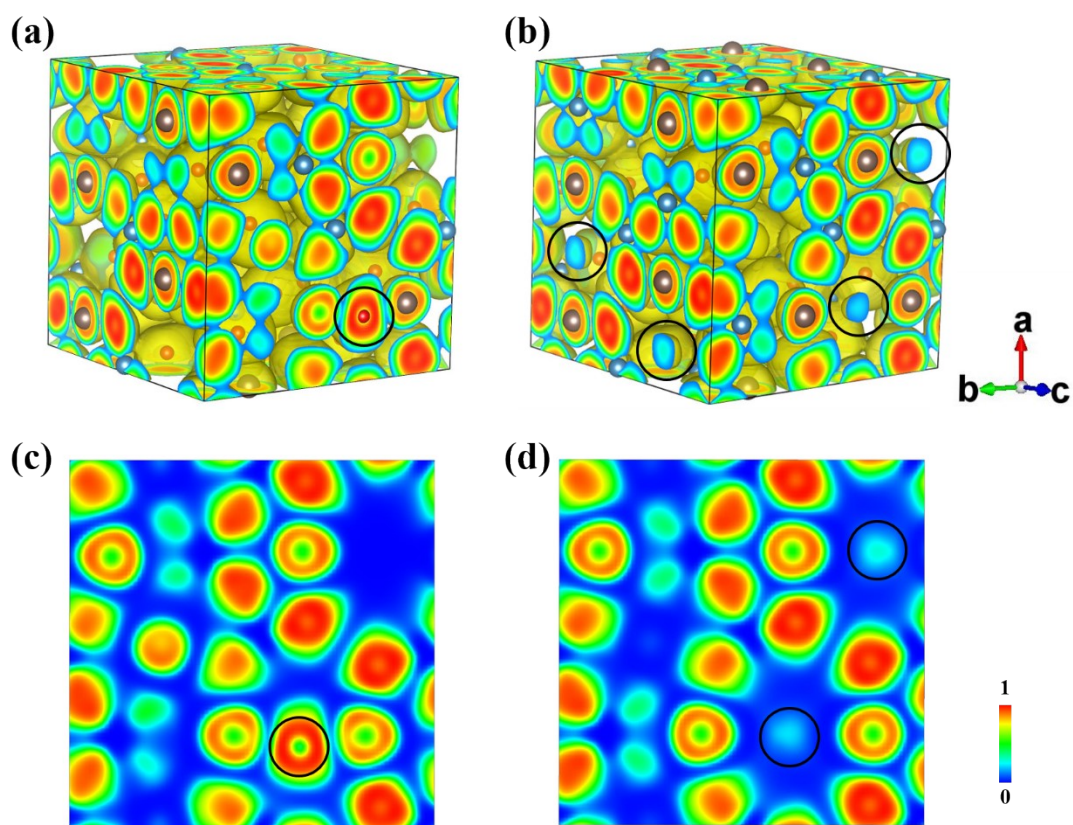

**Figure S6.** Isosurface of electron localization function (ELF) with the value of 0.1 for  $\text{C12A7:O}^{2-}$  (a) and  $\text{C12A7:e}^-$  (b). ELF map in the (001) plane of  $\text{C12A7:O}^{2-}$  (c) and  $\text{C12A7:e}^-$  (d). The O (cage) and interstitial electrons are respectively encircled by black circles.

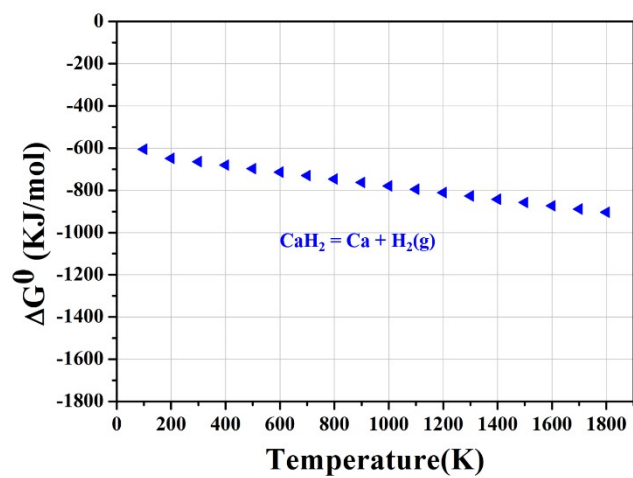

**Figure S7.** Thermodynamics analysis of the  $\text{CaH}_2$  decomposition. It is indicated that  $\text{CaH}_2$  decomposition is intensively exothermic process.

## REFERENCES

- [1] P. Manfrinetti, M. L. Fornasini, A. Palenzona. *Intermetallics*, 2000, **8**, 223.
